# Supplementary material for: Adsorption and Release Properties of Drug Delivery System Naproxen-SBA-15: Effect of Surface Polarity, Sodium/Acid Drug Form and pH
Source: MDPI journal article supplement (doi:10.3390/jfb13040275), 2022-12-05
Supplement: s1 [file s1]

**Adsorption and Release Properties of Drug Delivery System Naproxen - SBA-15:  
Effect of Surface Polarity, Sodium/Acid Drug Form and *pH***

Luboš Zauška<sup>a</sup>, Eva Beňová<sup>a</sup>, Martina Urbanová<sup>b</sup>, Jíří Brus<sup>b</sup>, Vladimír Zelenák<sup>a</sup>,  
Virginie Hornebecq<sup>c</sup>, Miroslav Almáši<sup>a</sup>

<sup>a</sup>Department of Inorganic Chemistry, Faculty of Science, P. J. Šafárik University,  
Moyzesova 11, SK-041 01 Košice, Slovak Republic

<sup>b</sup> Laboratory of Solid State NMR Spectroscopy, Department of Macromolecular  
Chemistry, Academy of Sciences of the Czech Republic, Heyrovsky square 2, CZ-  
162 06 Prague, Czech Republic

<sup>c</sup> Aix-Marseille University, CNRS, MADIREL, F-133 97 Marseille, France

**Figures:**

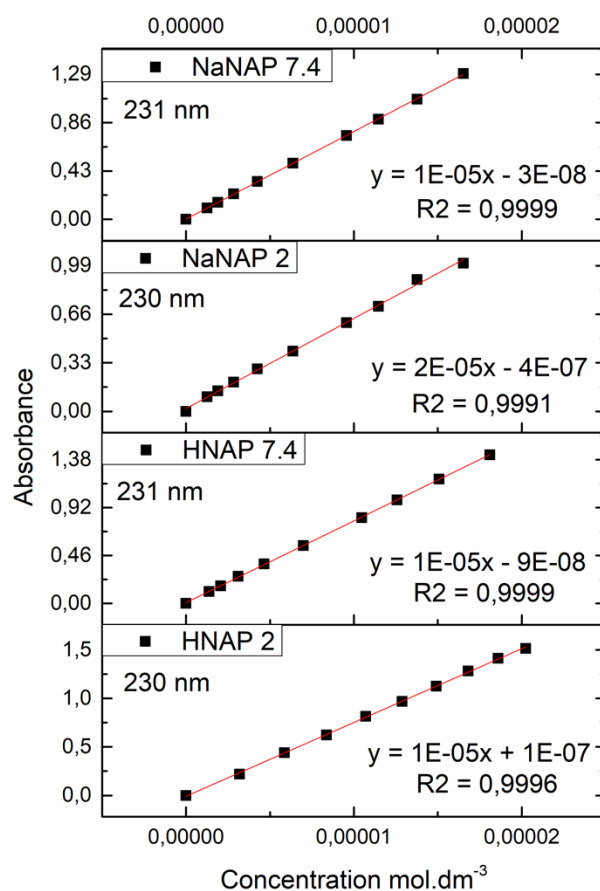

**Figure S1.** Calibration curves of naproxen sodium and naproxen acid at different  $pH$  obtained from UV measurements used for determination of total released amount of drug.

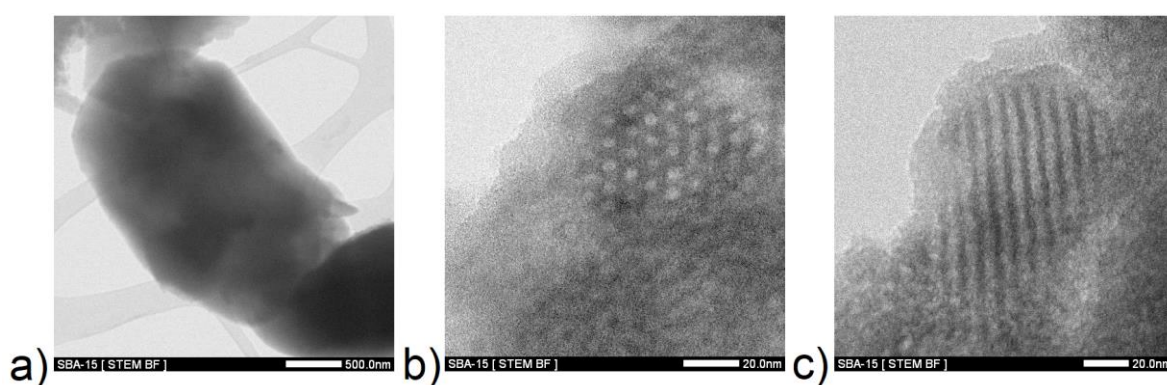

**Figure S2.** TEM images of prepared SBA-15 material: a) a shape of particles and a view along b) along and c) parallel direction to the pores.

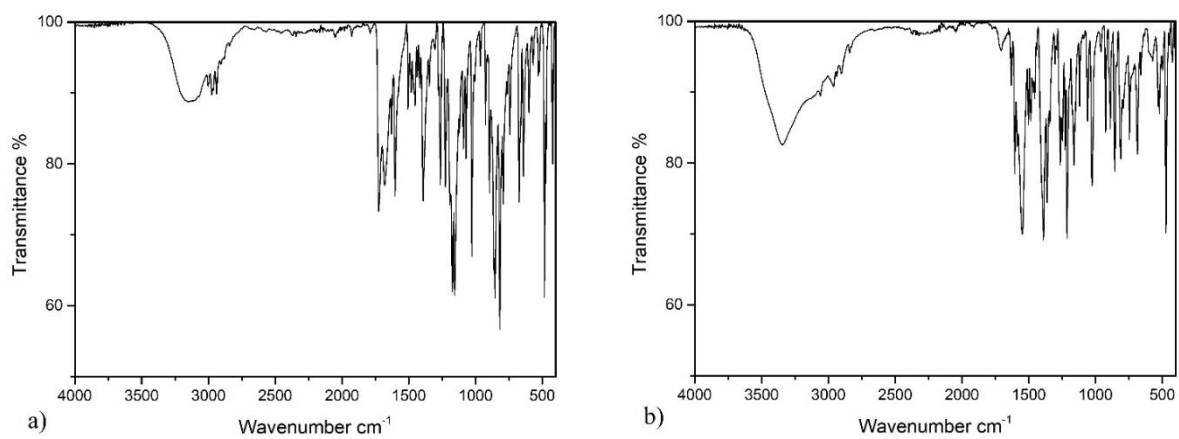

**Figure S3.** IR spectra of a) naproxen acid and b) naproxen sodium.

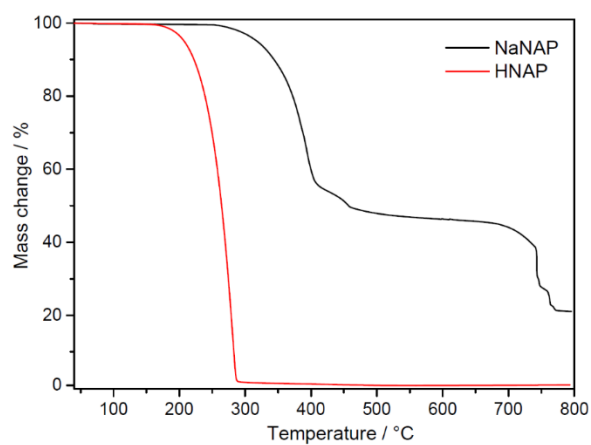

**Figure S4.** TG curves of pure drugs: naproxen sodium and naproxen acid measured in an air atmosphere.
